# Supplementary material
Source: PubMed Central journal article supplement (PMC3814030)
Supplement: NIHMS509946-supplement-Figure.pdf [file NIHMS509946-supplement-Figure.pdf]

## Supplemental Data

## Solution NMR Structure of a Designed Metalloprotein and Complementary Molecular Dynamics Refinement

Jennifer R. Calhoun, Weixia Liu, Katrin Spiegel, Matteo Dal Peraro, Michael L. Klein, Kathleen G. Valentine, A. Joshua Wand, and William F. DeGrado

Table S1. Interatomic Distances (Å) at the Metal Center in di-Zn(II) DF Proteins<sup>\*\*</sup>

| Atoms              | NMR  | QM/MM -MD | classic-MD | DF2  | DF1  |
|--------------------|------|-----------|------------|------|------|
| OE2(E44)—OE2(E104) | 1.93 | 3.26      | 3.57       | 2.92 | 3.31 |
| OE1(E44)—OE2(E104) | 3.25 | 4.05      | 4.17       | 3.04 | 3.73 |
| OE1(E11)—OE1(E104) | 2.97 | 3.72      | 3.47       | 3.35 | 2.40 |
| OE2(E11)—OE1(E104) | 1.60 | 3.13      | 3.16       | 2.68 | 3.55 |
| OE1(E44)—OE1(E74)  | 2.46 | 3.14      | 2.94       | 3.22 | 2.79 |
| OE2(E44)—OE1(E74)  | 3.74 | 4.26      | 3.96       | 2.66 | 4.05 |
| OE1(E11)—OE2(E74)  | 2.40 | 3.47      | 3.35       | 3.00 | 3.71 |
| OE2(E11)—OE2(E74)  | 3.74 | 3.25      | 3.16       | 2.91 | 2.87 |
| OE1(E104)—OE1(E74) | 4.19 | 3.85      | 3.32       | 4.09 | 3.54 |
| OE2(E104)—OE1(E74) | 3.74 | 3.25      | 2.96       | 3.01 | 3.62 |
| OE1(E104)—OE2(E74) | 3.18 | 3.57      | 3.96       | 2.92 | 3.55 |
| OE2(E104)—OE2(E74) | 3.80 | 4.25      | 4.53       | 3.03 | 3.74 |

<sup>\*\*</sup> DF2 E11'=DFsc11, DF2 E11=DFscE44  
DF2 E37=DFscE74, DF2 E37'=DFscE104  
DF1 PDB 1EC5, DF2 1u7J1

Table S2. Upper and Lower Limits of Bond Lengths Used to Calculate the di-Zn(II) DFsc Structure (All Measurements in Å)

|          | Zn1         |          | Zn2         |
|----------|-------------|----------|-------------|
| E44-OE1  | 2.10 ± 0.40 | E11-OE1  | 2.10 ± 0.40 |
| E44-OE2  | 2.10 ± 0.40 | E11-OE2  | 2.10 ± 0.40 |
| E74-OE1  | 2.10 ± 0.40 | E74-OE2  | 2.10 ± 0.40 |
| H77-ND1  | 2.10 ± 0.20 | H107-ND1 | 2.10 ± 0.20 |
| E104-OE2 | 2.10 ± 0.40 | E104-OE1 | 2.10 ± 0.40 |

Zn-Zn bond length 4.0 ± 0.20

Table S3. Average Zn(II) Ligand Distances after Classical MD Simulation (See for Comparison with Table 1 in the Manuscript)

| Zn 1                  | Distance (Å) | Zn 2     | Distance (Å) |
|-----------------------|--------------|----------|--------------|
| E44-OE1               | 2.19 ± 0.10  | E11-OE1  | 3.37 ± 0.33  |
| E44-OE2               | 2.10 ± 0.07  | E11-OE2  | 2.06 ± 0.06  |
| E74-OE1               | 2.10 ± 0.06  | E74-OE2  | 2.07 ± 0.06  |
| H77-ND1               | 2.32 ± 0.13  | H107-ND1 | 2.29 ± 0.12  |
| E104-OE2              | 2.07 ± 0.07  | E104-OE1 | 2.11 ± 0.07  |
| Zn1-Zn2 = 3.59 ± 0.19 |              |          |              |

Table S4. Charges at the Dizinc Site

| <b>Zn</b>    |                   |              |                   |
|--------------|-------------------|--------------|-------------------|
|              | 1.35 (2.0)        |              |                   |
| <b>His</b>   |                   | <b>Glu</b>   |                   |
| ND1          | -0.6532 (-0.5432) | OE1          | -0.7400 (-0.8188) |
| CE1          | 0.1835 (0.1635)   | OE2          | -0.8400 (-0.8188) |
| HE1          | 0.1535 (0.1435)   | CD           | 0.7600 (0.8054)   |
| NE2          | -0.3395 (-0.2795) | CG           | 0.1200 (0.0136)   |
| HE2          | 0.3339 (0.3339)   | HG           | -0.0200 (-0.0425) |
| CD2          | -0.1407 (-0.2207) | CB           | 0.0860 (0.0560)   |
| HD2          | 0.1962 (0.1862)   | HB           | -0.0053 (-0.0173) |
| CG           | 0.2568 (0.1868)   | CA           | 0.0597 (0.0397)   |
| CB           | 0.0874 (-0.0074)  | HA           | 0.1305 (0.1105)   |
| HB2          | 0.0467 (0.0367)   | Total charge | -0.74 (-1.0)      |
| Total charge | 0.13 (0.00)       |              |                   |

Original parm99 (AMBER) charges are shown in parenthesis.

Table S5. Distances between Helix 1 and 2 and Helix 3 and 4 for Central 5 Origins [Å]  
(see Figure S2 and Experimental Procedures)

| (a) Helix 1-2 |            |                   |                               |             |
|---------------|------------|-------------------|-------------------------------|-------------|
| Origins       | DFsc-NMR   | DFsc MD           | DFsc target<br>designed model | DF2         |
| 6-10          | 8.9        | 11.1 ± 0.4        | 10.5                          | 10.3        |
| 6-9           | 9.2        | 11.0 ± 0.4        | 10.5                          | 10.7        |
| 7-9           | 8.7        | 11.0 ± 0.4        | 10.6                          | 10.4        |
| 7-8           | 8.9        | 10.8 ± 0.4        | 10.4                          | 10.6        |
| 8-8           | 8.8        | 10.8 ± 0.4        | 10.4                          | 10.3        |
| 8-7           | 8.3        | 10.7 ± 0.4        | 10.4                          | 10.5        |
| <b>8-6</b>    | <b>8.0</b> | <b>10.8 ± 0.4</b> | <b>10.5</b>                   | <b>11.0</b> |
| 9-7           | 8.6        | 10.6 ± 0.4        | 10.6                          | 10.3        |
| 9-6           | 8.0        | 10.6 ± 0.4        | 10.5                          | 10.6        |
| 10-6          | 8.4        | 10.5 ± 0.4        | 10.6                          | 10.5        |
| 10-5          | 8.2        | 10.4 ± 0.4        | 10.6                          | 10.4        |

  

| (b) Helix 3-4                      |             |                   |                               |             |
|------------------------------------|-------------|-------------------|-------------------------------|-------------|
| Distance<br>between<br>origins [Å] | DFsc-NMR    | DFsc MD           | DFsc target<br>designed model | DF2         |
| 6-10                               | 10.6        | 11.6 ± 0.3        | 11.3                          | 10.4        |
| <b>6-9</b>                         | <b>10.6</b> | <b>11.5 ± 0.3</b> | <b>11.2</b>                   | <b>10.8</b> |
| 7-9                                | 11.1        | 11.6 ± 0.3        | 11.3                          | 10.5        |
| 7-8                                | 11.1        | 11.6 ± 0.3        | 11.2                          | 10.7        |
| 8-8                                | 11.3        | 11.7 ± 0.3        | 11.4                          | 10.4        |
| 8-7                                | 11.3        | 11.5 ± 0.3        | 11.2                          | 10.6        |
| 9-7                                | 11.0        | 11.6 ± 0.3        | 11.4                          | 10.3        |
| 9-6                                | 10.9        | 11.4 ± 0.3        | 11.2                          | 10.7        |
| 10-6                               | 10.9        | 11.6 ± 0.3        | 11.3                          | 10.6        |
| 10-5                               | 11.0        | 11.3 ± 0.3        | 11.1                          | 10.8        |

The closest distance found in the NMR-model is indicated in bold.

*NOE violations:* A total of sixteen violations of over 1 Å were observed relative to the NMR restraints. Of these, most all involved the sidechains of surface-exposed residues, although a few involved buried residues, which helped identify particularly flexible regions, in which sidechain conformations vary in different snapshots of the MD simulation. Table S6 lists the nine deviations that are greater than 2 Å. In particular, the flexibility of Y51 is interesting, as this residue appears to form an interaction with Fe(III) under some conditions (unpublished results).

Table S6. NOE Violations Observed in NMR Structure Determination

| Atoms                 | Distance violation | Apparent cause                                                        |
|-----------------------|--------------------|-----------------------------------------------------------------------|
| V41 (HG1) – K82 (HA)  | 2-3 Å              | Surface-exposed                                                       |
| Q13 (H) – A43(HB)     | 2-3 Å              | Surface-exposed                                                       |
| K76 (HE2) – H107(HE1) | 3-4 Å              | Surface-exposed                                                       |
| G88 (H) – L33(HD22)   | 3-4 Å              | Gly in flexible, surface-exposed loop                                 |
| N115(H) – D2(HA)      | 3-4 Å              | N- and C-terminal residues, surface-exposed                           |
| I37(HA) – S85(HB)     | 2-3 Å              | Internal dynamics                                                     |
| H107(H) – Y51(HE)     | 2-3 Å              | Internal dynamics                                                     |
| L36(HD2) – F93(HE1)   | 2-3 Å              | Internal dynamics                                                     |
| L101(HD2) – Y18(HE2)  | 3-4 Å              | Internal dynamics, alternate rotamer of L101 satisfies NOE restraint. |

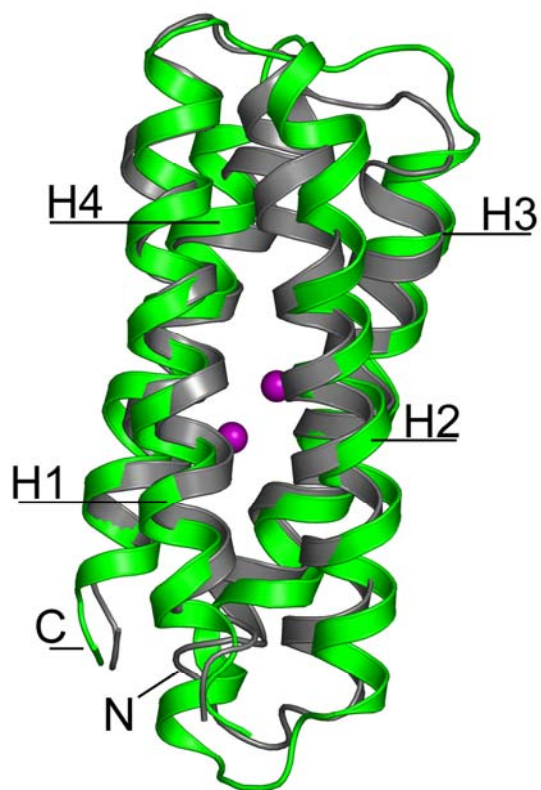

Figure S1. Superposition of di-Zn(II) DFsc Calculated NMR Structure (Gray) and MD Model of di-Zn(II) DFsc (Green)  
The helices are labeled H1-H4. The backbone rmsd for the calculated NMR structure and MD model is 1.1 Å.

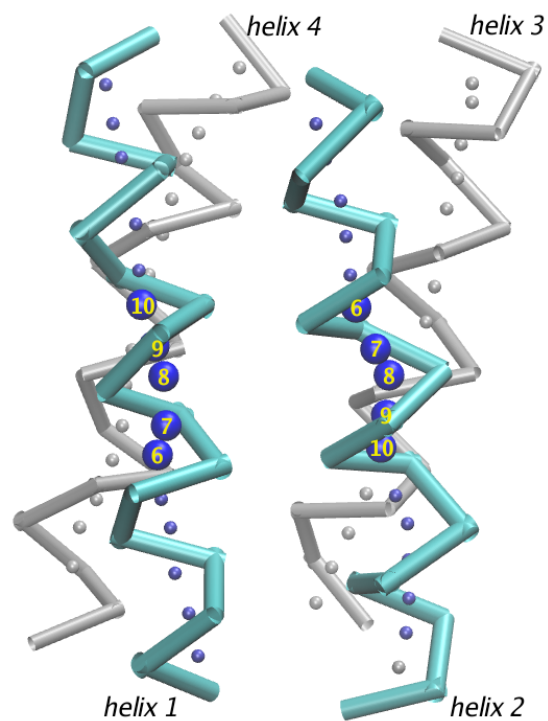

Figure S2. DFsc Calculated NMR Structure  
Trace of C $\alpha$  of residues 4-21 (helix 1), 37-54 (helix 2), 67-84 (helix 3), and 95-112 (helix 4). Axis points are shown as spheres, and the central five axis points of helix 1 and 2 are enlarged and numbered.
